# Supplementary material for: Artificial Intelligence May Predict Early Sepsis After Liver Transplantation
Source: PubMed Central journal article supplement (PMC8450439; doi:10.3389/fphys.2021.692667), 2021-09-06

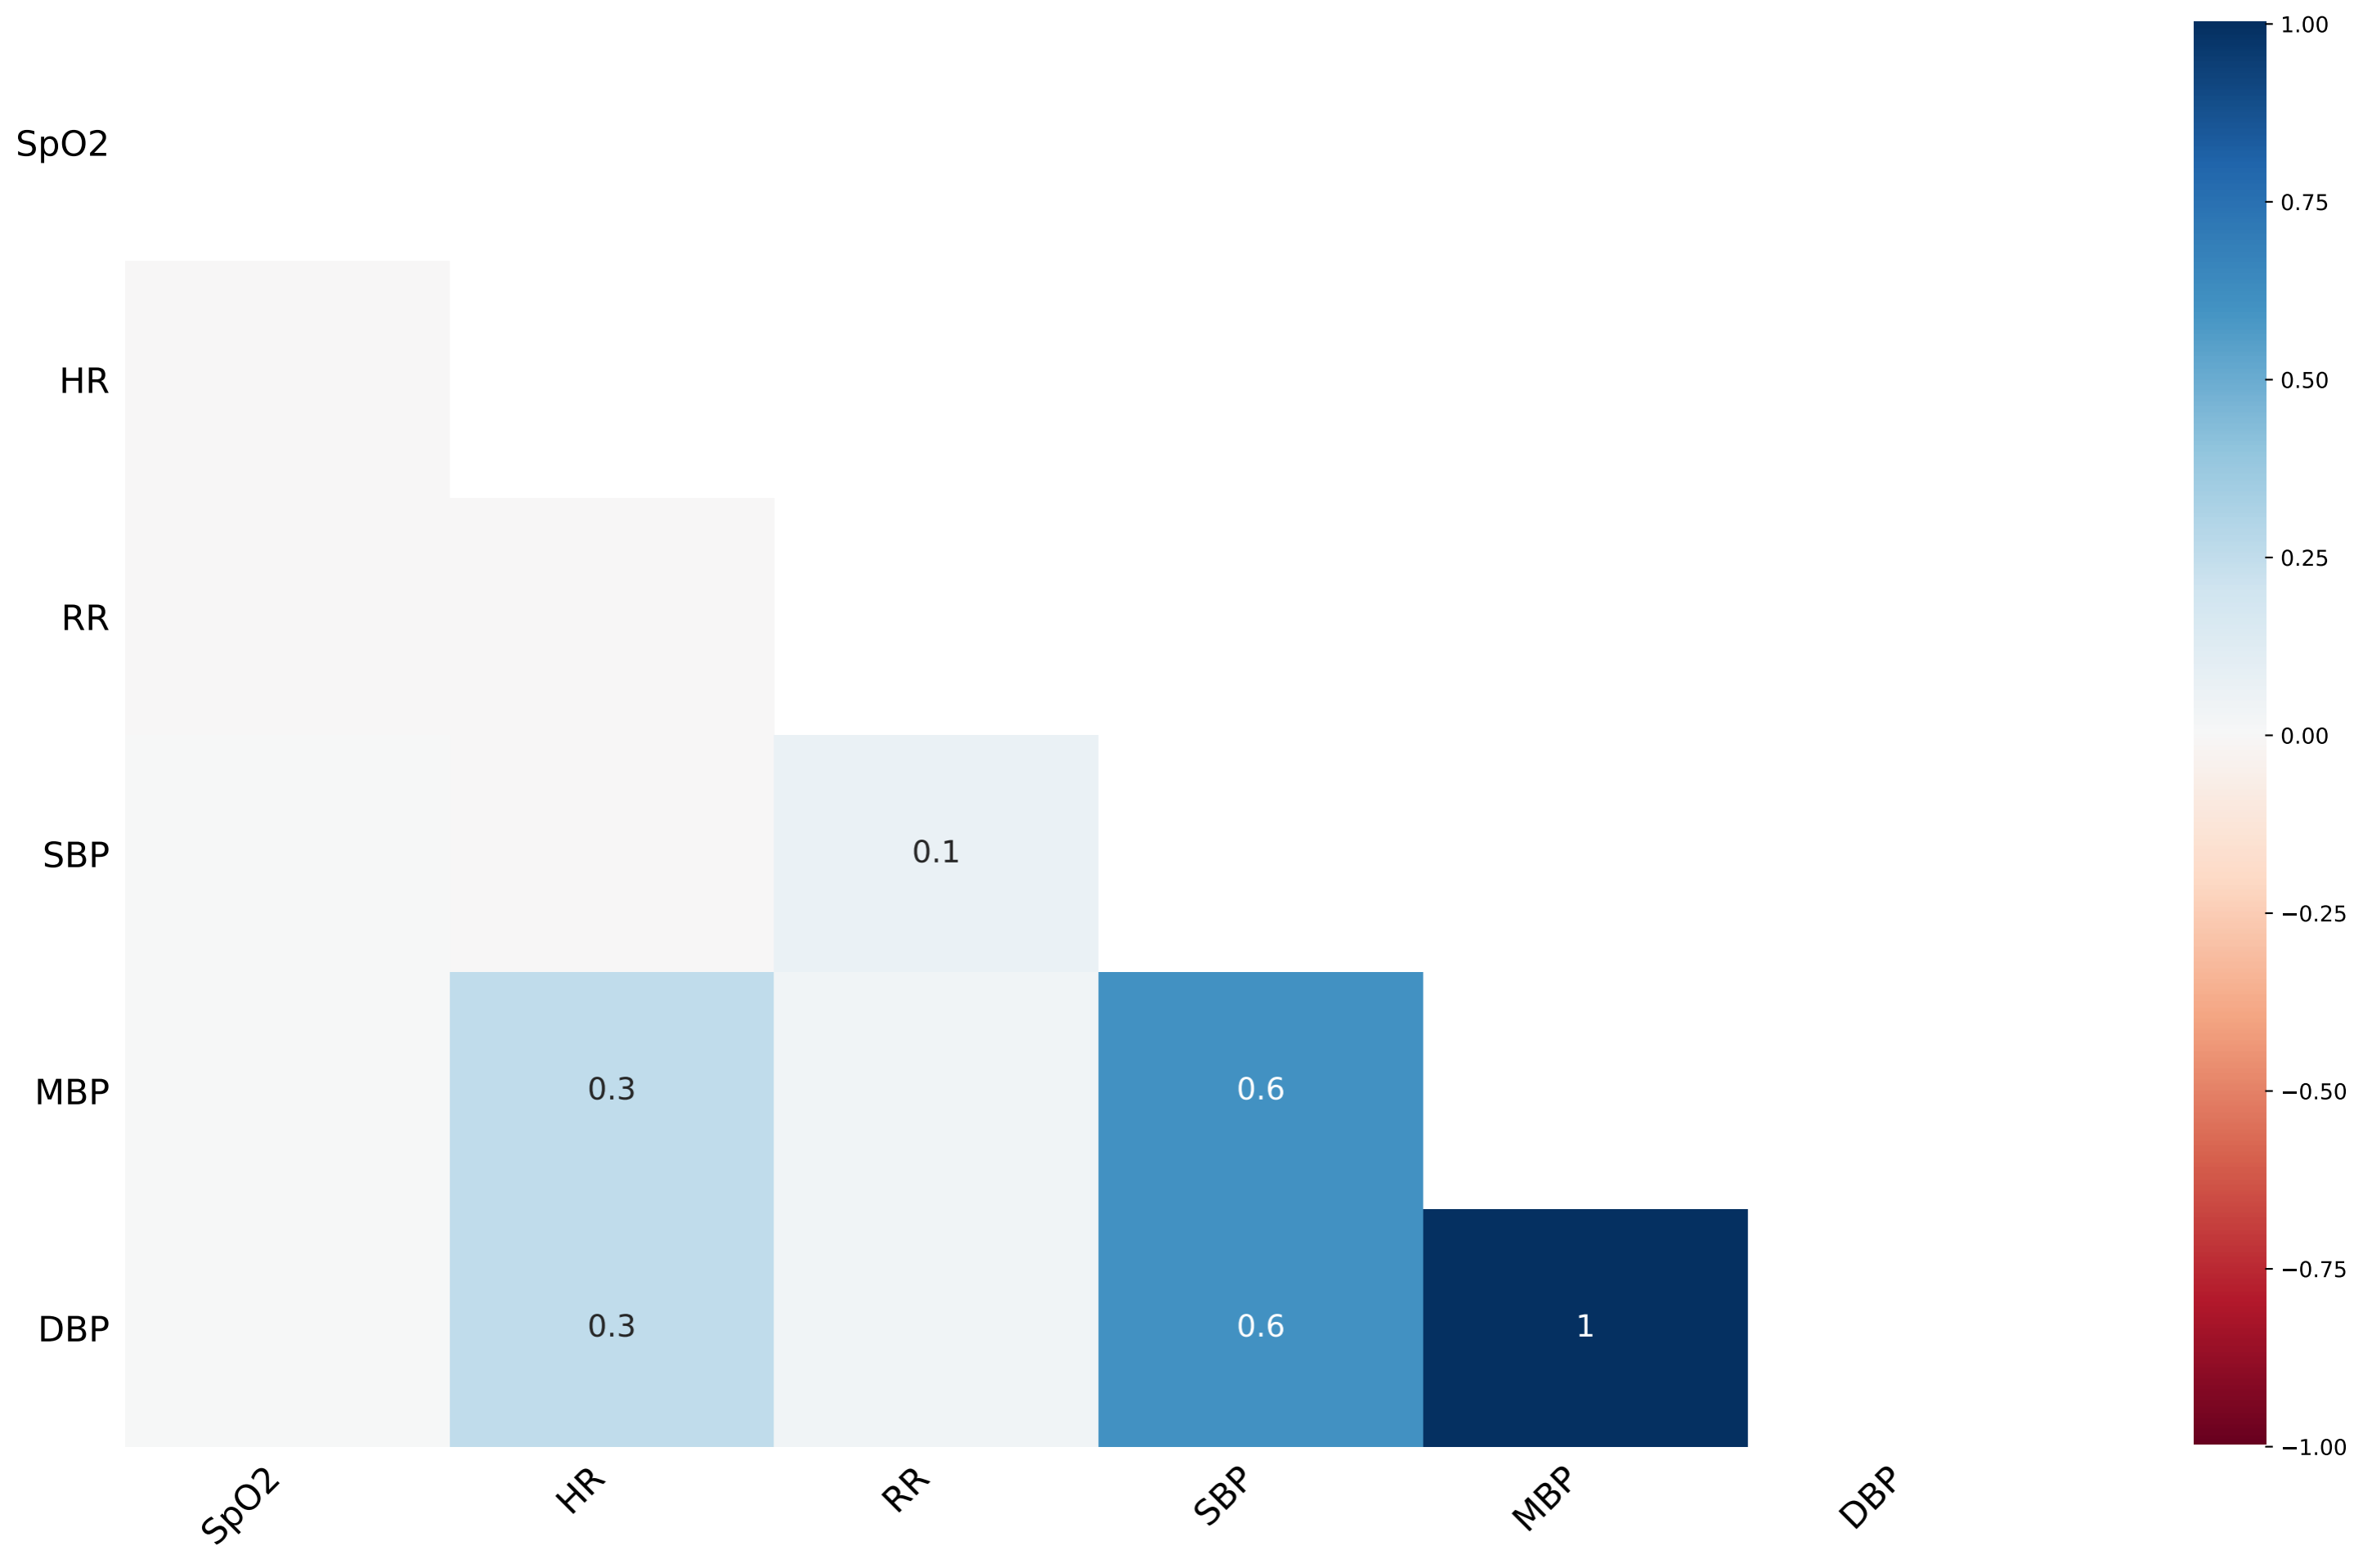

Supplement: Image_1.pdf [file Image_1.pdf]
